# Supplementary material
Source: HighWire-hosted journal article supplement (https://bmjopen.bmj.com/content/9/2/e026624)
Supplement: inline-supplementary-material-1 [file inline-supplementary-material-1.pdf]

## Supplementary material:

### Antibiotic treatment guidelines for each NHS trust included in the study

#### Community acquired pneumonia (CAP)

|              | Trust 1                                                                                                                                                                                                                                                                                                                                                        | Trust 2                                                                                                                                                                                                                                                                           |
|--------------|----------------------------------------------------------------------------------------------------------------------------------------------------------------------------------------------------------------------------------------------------------------------------------------------------------------------------------------------------------------|-----------------------------------------------------------------------------------------------------------------------------------------------------------------------------------------------------------------------------------------------------------------------------------|
| Mild CAP     | <p>Mild CAP previously untreated<br/>Amoxicillin 500-1000mg PO TDS</p> <p><i>Penicillin allergy:</i> clarithromycin 500mg PO BD</p> <p>Mild CAP previously treated in community<br/>Amoxicillin 500-1000mg PO BD TDS + clarithromycin 500mg PO BD</p> <p><i>Penicillin allergy:</i> doxycycline 200mg PO STAT then 100mg PO BD or levofloxacin 500mg PO OD</p> | <p>Low severity<br/>Amoxicillin 500-1000mg PO TDS</p> <p><i>Penicillin allergy:</i> clarithromycin 500mg PO BD</p>                                                                                                                                                                |
| Moderate CAP | <p>Amoxicillin 500-1000mg PO BD TDS + clarithromycin 500mg PO BD</p> <p><i>Penicillin allergy:</i> doxycycline 200mg PO STAT then 100mg PO BD or levofloxacin 500mg PO OD</p>                                                                                                                                                                                  | <p>Amoxicillin 500mg-1000mg 1g IV/POTDS+ clarithromycin 500mg PO/IV BD</p> <p>If aspiration suspected substitute amoxicillin with co-amoxiclav 625mg TDS of 1.2g TDS</p> <p><i>Penicillin allergy:</i> doxycycline 200mg PO STAT then 100mg PO OD or moxifloxacin 400mg PO OD</p> |
| Severe CAP   | <p>Co-amoxiclav 1.2g IV TDS plus clarithromycin 500mg IV/PO BD.</p> <p><i>Penicillin allergy:</i> Levofloxacin 500mg IV BD alone or Cefuroxime 1.5g IV TDS + clarithromycin 500mg IV BD</p>                                                                                                                                                                    | <p>Co-amoxiclav 1.2g IV TDS plus clarithromycin 500mg IV BD (if legionella or <i>S. aureus</i> pneumonia suspected, add rifampicin 300mg PO/IV BD)</p> <p><i>Penicillin allergy:</i> Vancomycin loading, then 15mg/kg IV BD + ciprofloxacin 400mg IV BD</p>                       |

## Hospital Acquired pneumonia (HAP)

|                     | Trust 1                                                                                                                                                              | Trust 2                                                                                                                                                                                                                                                                   |
|---------------------|----------------------------------------------------------------------------------------------------------------------------------------------------------------------|---------------------------------------------------------------------------------------------------------------------------------------------------------------------------------------------------------------------------------------------------------------------------|
| <b>Mild HAP</b>     | Trimethoprim 200mg PO BD or doxycycline 200mg PO STAT then 100mg PO OD                                                                                               | <p>Non-severe HAP</p> <p>Co-amoxiclav 625mg PO TDS or 1.2g IV TDS.</p> <p>IF MRSA risk doxycycline* 200mg stat then 100mg PO BD</p> <p><i>Penicillin allergy:</i> clarithromycin* 500mg PO/IV BD</p> <p>*If aspiration add metronidazole 400mg PO TDS or 500mg IV TDS</p> |
| <b>Moderate HAP</b> | Co-trimoxazole 1.44g PO/IV BD                                                                                                                                        |                                                                                                                                                                                                                                                                           |
| <b>Severe HAP</b>   | <p>Ceftriaxone 2g IV OD + gentamicin</p> <p><i>Penicillin allergy:</i> ciprofloxacin 500mg PO BD or 400mg IV BD. Consider adding vancomycin if MRSA or very sick</p> | <p>Piperacillin-tazobactam 4.5g IV TDS. If MRSA risk add vancomycin.</p> <p><i>Penicillin allergy:</i> vancomycin + ciprofloxacin 500mg PO BD or 400mg IV BD. If aspiration add metronidazole 500mg IV TDS</p>                                                            |

## Skin and soft tissue infection (SSTI)

|                                                                        | Trust 1                                                                                                                                                                     | Trust 2                                                                                                                                                                                                                                                                                                                  |
|------------------------------------------------------------------------|-----------------------------------------------------------------------------------------------------------------------------------------------------------------------------|--------------------------------------------------------------------------------------------------------------------------------------------------------------------------------------------------------------------------------------------------------------------------------------------------------------------------|
| <b>Cellulitis (uncomplicated)</b>                                      | Flucloxacillin 500mg-1g PO QDS<br><br><i>Penicillin allergy:</i> clindamycin 300mg PO QDS                                                                                   | Flucloxacillin 1g PO/IV QDS<br><br><i>Penicillin allergy:</i> clarithromycin 500mg PO/IV BD                                                                                                                                                                                                                              |
| <b>Cellulitis (MRSA)</b>                                               | Vancomycin                                                                                                                                                                  | Doxycycline 200mg STAT then 100mg PO OD or vancomycin                                                                                                                                                                                                                                                                    |
| <b>Cellulitis (complicated) with comorbidities +/-systemically ill</b> | Flucloxacillin 2g IV QDS or ceftriaxone 2g IV OD<br><br><i>Penicillin allergy:</i> clindamycin 300-450mg PO QDS                                                             | Co-amoxiclav 625mg PO TDS or 1.2g IV TDS<br>(add vancomycin if MRSA risk)<br><br><i>Penicillin allergy:</i> clarithromycin 500mg PO BD + ciprofloxacin 500mg BD + metronidazole 400mg PO TDS<br><br>Or if IV required:<br>Vancomycin loading then 15mg/kg IV BD + ciprofloxacin 400mg IV BD + metronidazole 500mg IV TDS |
| <b>Bites</b>                                                           | Co-amoxiclav 625mg TDS<br><br><i>Penicillin allergy:</i> metronidazole 400mg PO TDS +<br>Doxycycline 200mg PO OD (animal bites) or clarithromycin 500mg PO BD (human bites) | Co-amoxiclav 625mg PO TDS<br><br><i>Penicillin allergy:</i> clindamycin 300mg PO QID and ciprofloxacin 500mg PO BD                                                                                                                                                                                                       |

## Urinary tract infections (UTI)

|                                                    | Trust 1                                                                                                                                                                                                                                                  | Trust 2                                                                                                                 |
|----------------------------------------------------|----------------------------------------------------------------------------------------------------------------------------------------------------------------------------------------------------------------------------------------------------------|-------------------------------------------------------------------------------------------------------------------------|
| <b>UTI uncomplicated</b>                           | <p>Female: cefalexin 500mg PO BD or nitrofurantoin 50mg PO QDS</p> <p><i>Penicillin allergy:</i> nitrofurantoin 50mg PO QDS</p> <p>Male: Cephalexin 500mg PO BD or ciprofloxacin 500 PO BD</p> <p><i>Penicillin allergy:</i> ciprofloxacin 500 PO BD</p> | <p>Co-amoxiclav 625mg PO TDS</p> <p><i>Penicillin allergy:</i> cephalexin 500mg PO QDS or ciprofloxacin 500mg PO BD</p> |
| <b>UTI complicated (pyelonephritis, urosepsis)</b> | <p>Co-amoxiclav 1.2g TDS IV + consider gentamicin</p> <p><i>Penicillin allergy:</i> ciprofloxacin 400mg IV BD</p>                                                                                                                                        | <p>Co-amoxiclav 1.2g TDS IV*</p> <p><i>Penicillin allergy:</i> ciprofloxacin 400mg IV BD or gentamicin 5mg/kg OD</p>    |
